# Supplementary material for: 3-Dimensional architecture of the human multi-tRNA synthetase complex
Source: PubMed Central journal article supplement — Nucleic Acids Res. 2020 Jul 9;48(15):8740–54. doi: 10.1093/nar/gkaa569 (PMC7470956; doi:10.1093/nar/gkaa569), 2020-07-09
Supplement: gkaa569_supplemental_file.pdf [file gkaa569_supplemental_file.pdf]

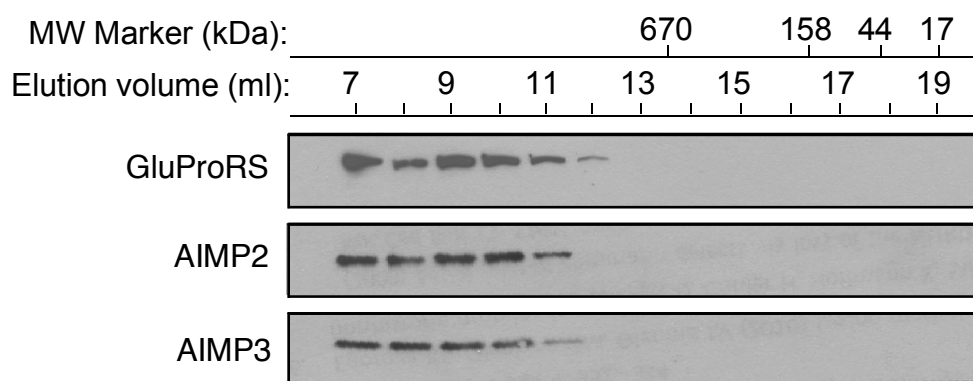

**Figure S1.** GluProRS in the MSC. HEK293T cells were grown in DMEM until 80-90% confluent. The cells were lysed in buffer containing 20 mM Tris-HCl (pH 7.5), 150 mM NaCl, 0.5% Triton X-100 and Protease Inhibitor Cocktail, and the debris cleared by ultracentrifugation at 100,000 g for 1 h. The cleared lysate (3 mg protein) was applied to a Superose-6 FPLC column, and eluted at a flow rate of 0.5 ml/min in buffer containing 50 mM Tris-HCl (pH 7.5), 150 mM NaCl, 1 mM phenylmethanesulfonyl fluoride, and 1 mM dithiothreitol. Thyroglobulin (670 kDa), gamma globulin (158 kDa), ovalbumin (44 kDa), bovine serum albumin (66 kDa), myoglobin (17 kDa), and vitamin B<sub>12</sub> (1.35 kDa, not shown) served as molecular weight standards. Aliquots from alternate fractions were run on 4-20% SDS-PAGE for western blot analysis.

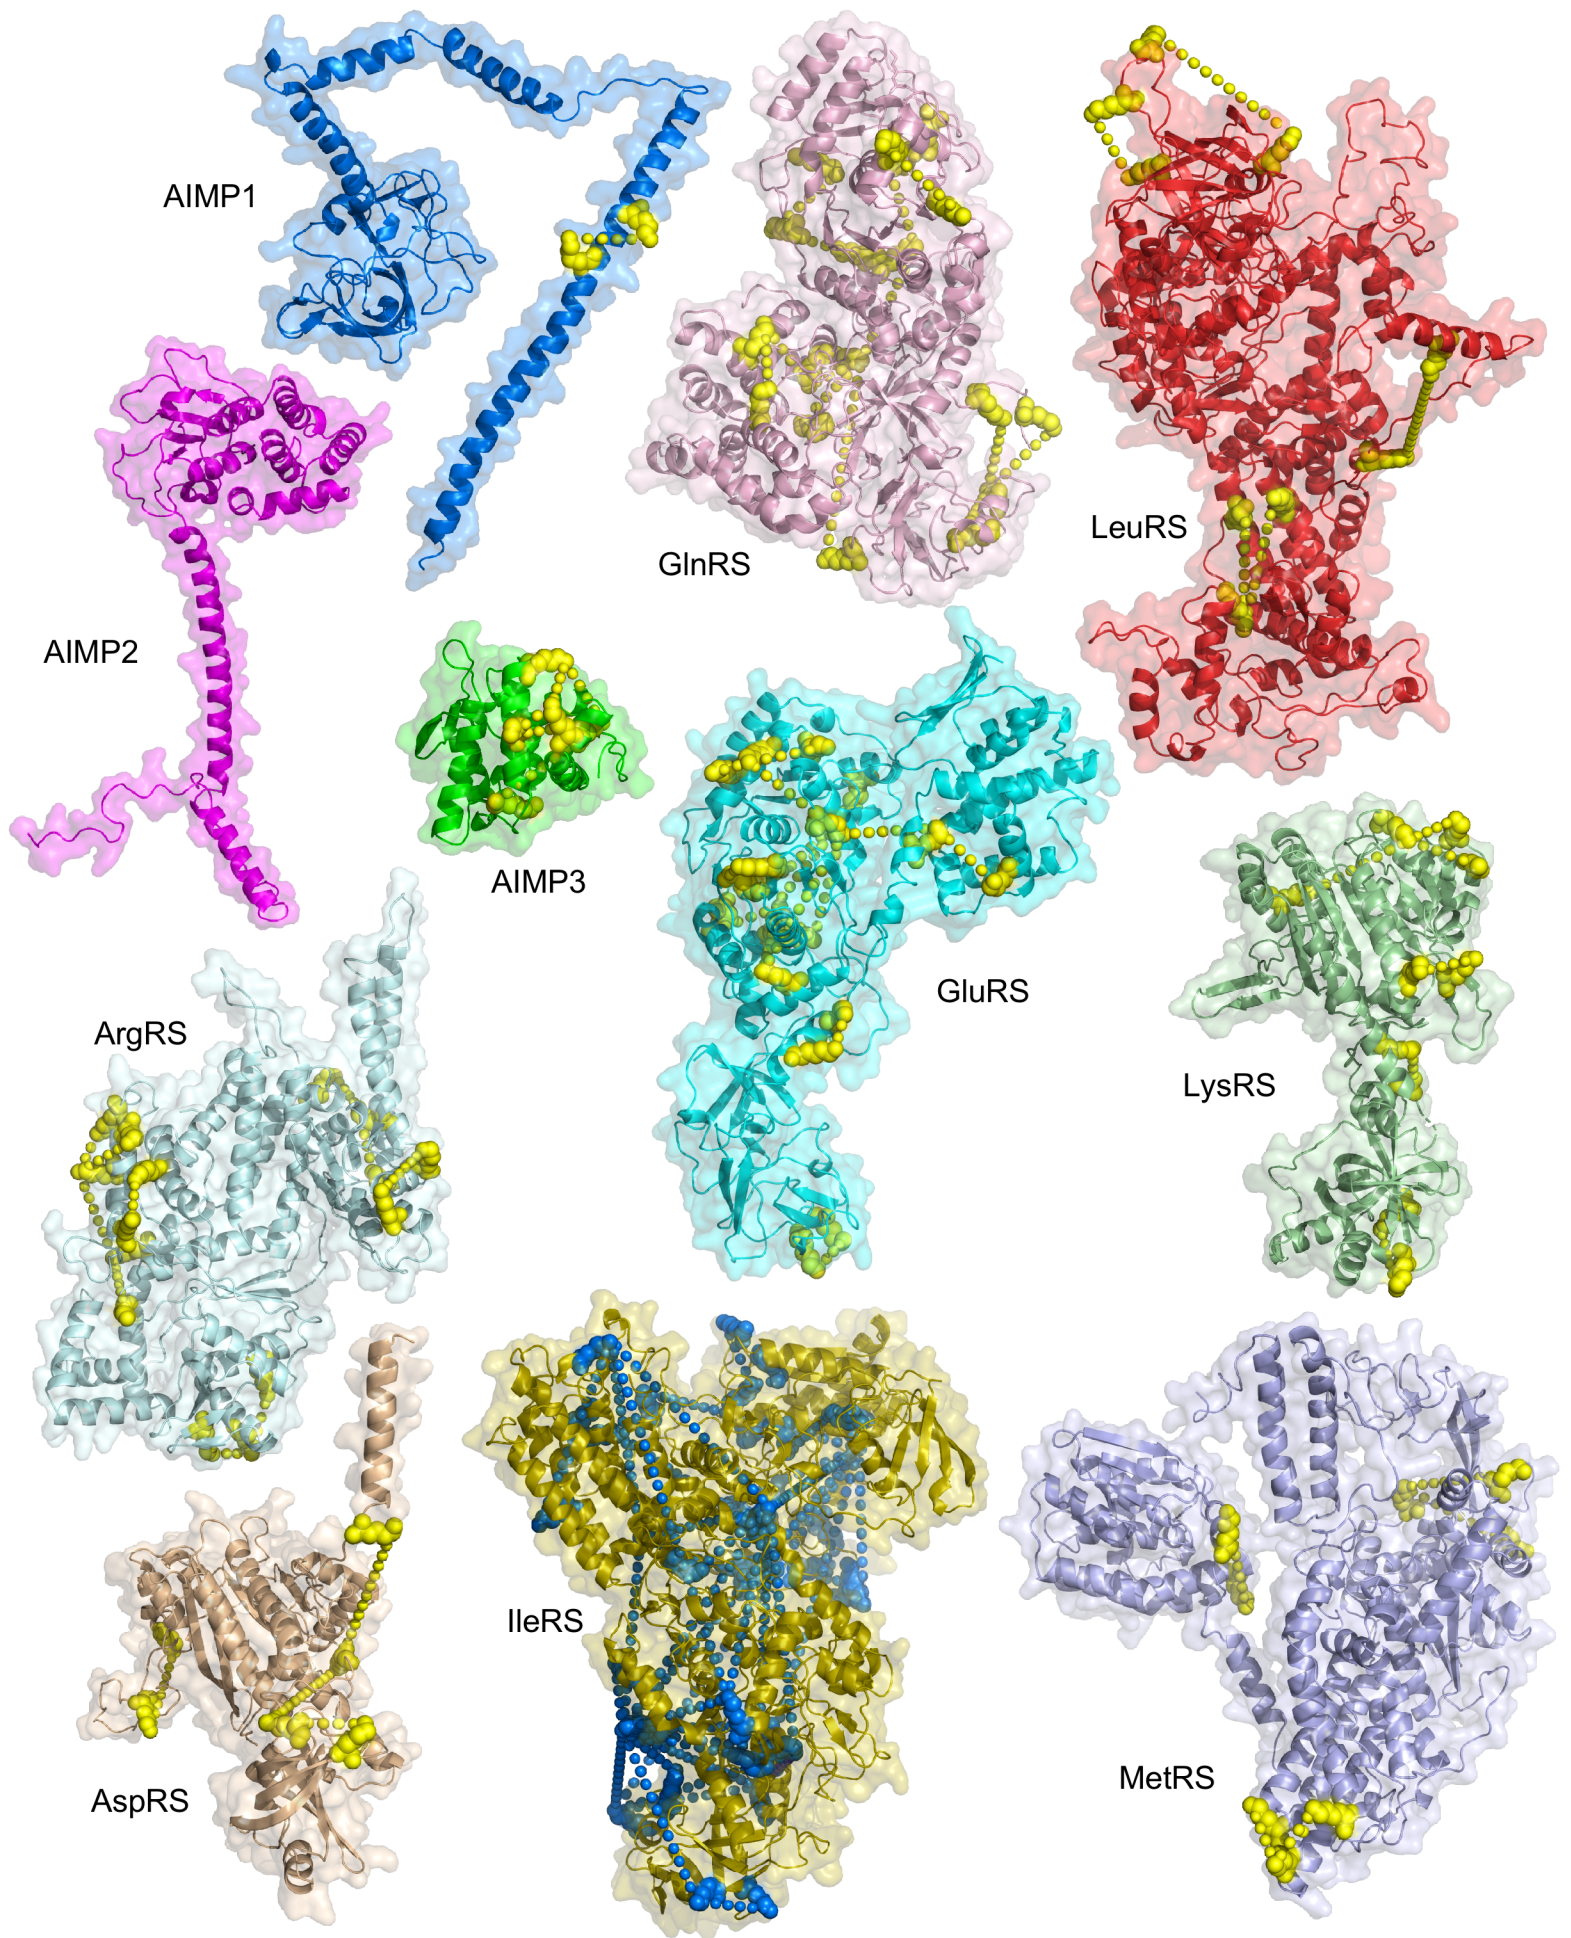

**Figure S2.** MSC constituent structures. X-ray structures after adjustment for intra- and inter-protein XL-MS crosslinks. Lys residues and their intra-protein cross-links shown as yellow spheres (or blue for IleRS).



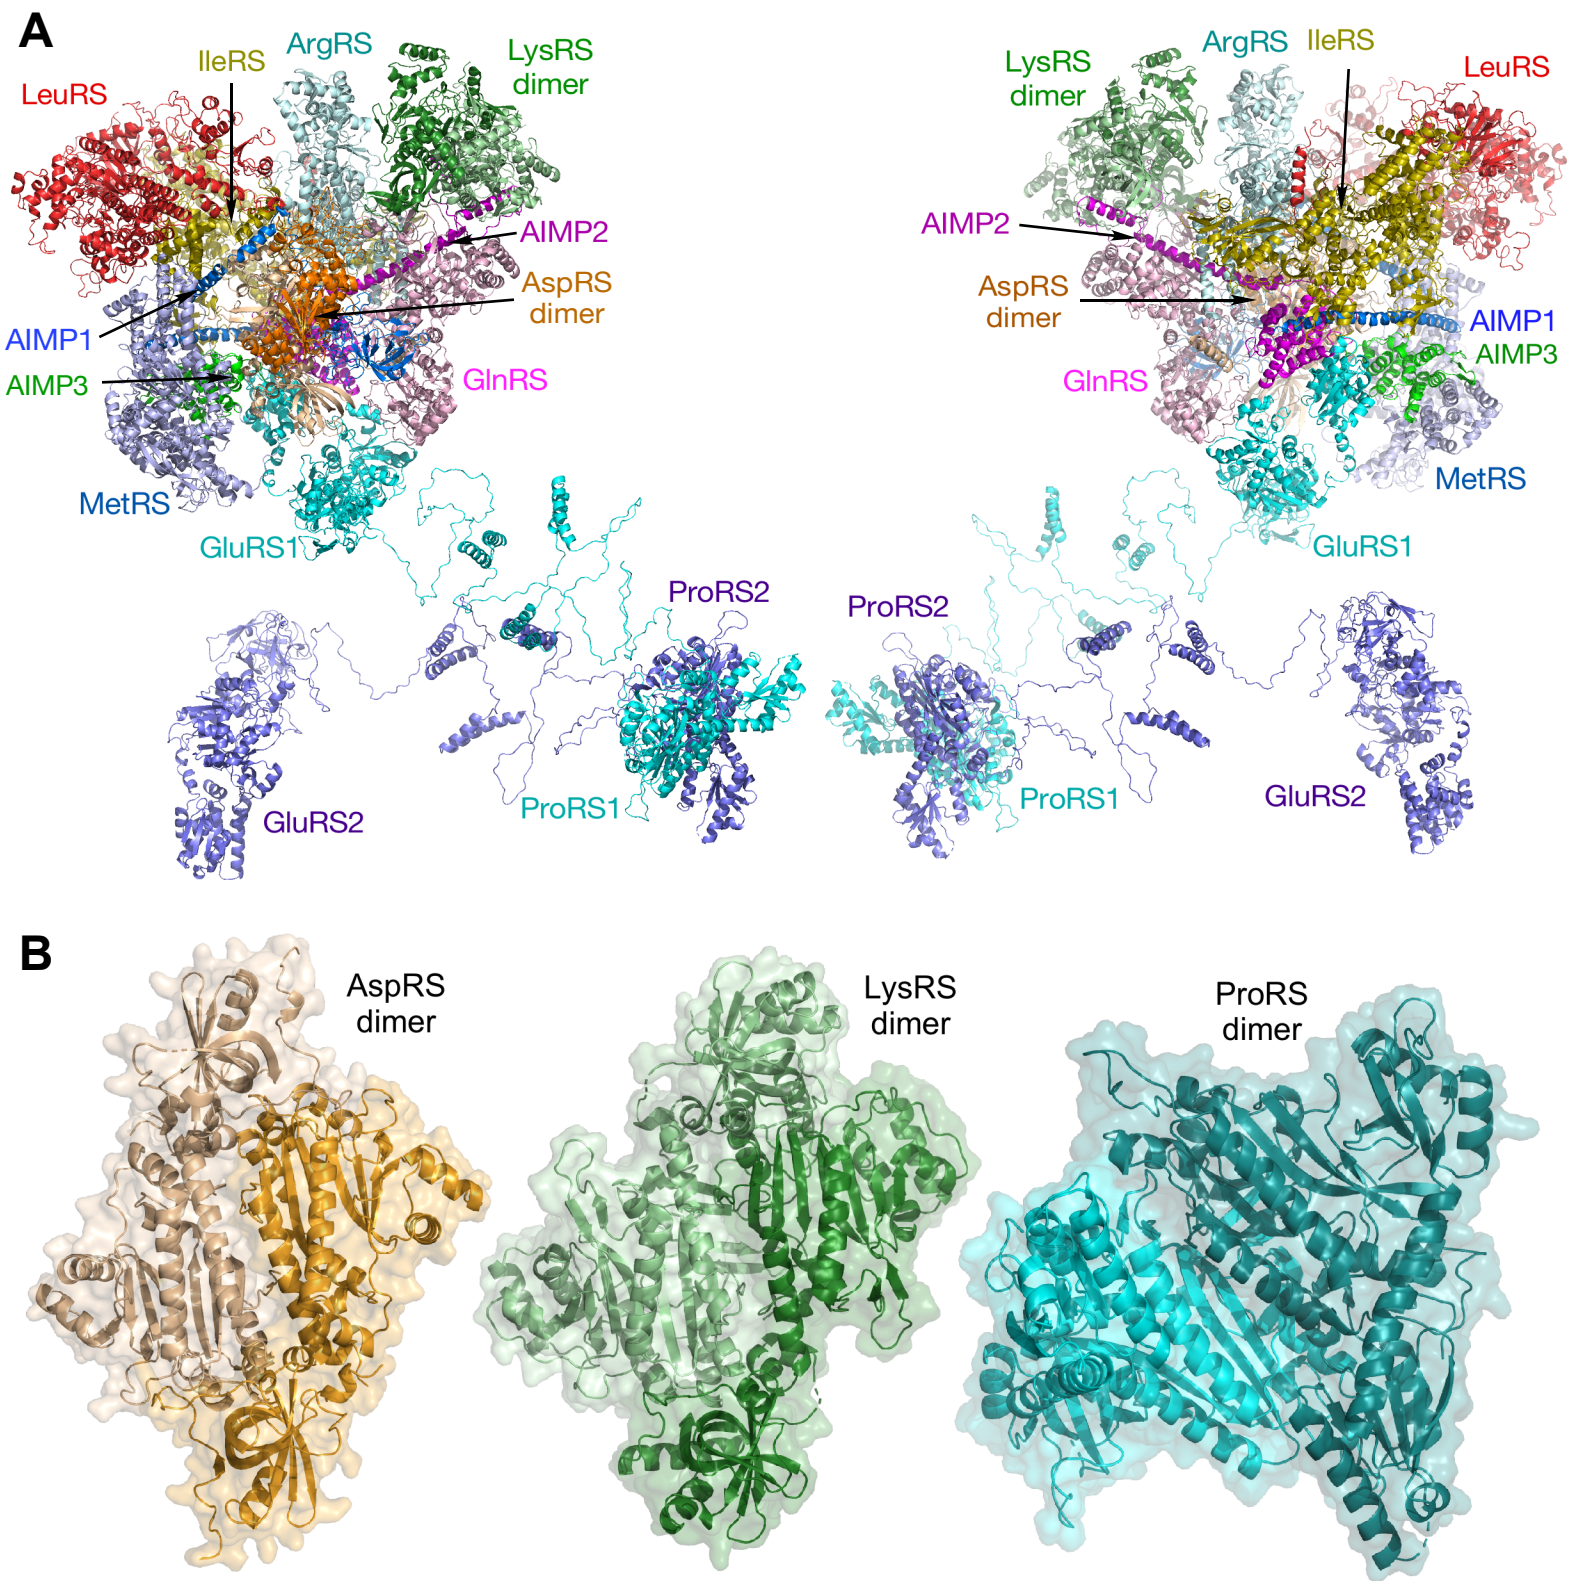

**Figure S3.** MSC structures with dimer constituents. **(A)** Ribbon models of front (left) and rear (right) views of the MSC including dimers of AspRS, LysRS, and GluProRS. **(B)** X-ray structures of AspRS (left, PDB ID: 4J15), LysRS (center, PDB ID: 6ILD), and ProRS (right, PDB ID: 4HVC) dimers.

**Supplementary Table S1.** Inter-protein cross-links identified by XL-MS.

| Peptide A              | Peptide B                 | Occurrences,<br>in-cell<br>experiment<br>(n=1) | Occurrences,<br>on-bead<br>experiments<br>(n=3) |
|------------------------|---------------------------|------------------------------------------------|-------------------------------------------------|
| AIMP1 K <sub>129</sub> | ArgRS K <sub>471</sub>    | -                                              | 1                                               |
|                        |                           |                                                |                                                 |
| AIMP2 K <sub>64</sub>  | GlnRS K <sub>759</sub>    | -                                              | 2                                               |
|                        |                           |                                                |                                                 |
| AIMP2 K <sub>7</sub>   | LysRS K <sub>249</sub>    | -                                              | 3                                               |
| AIMP2 Y <sub>35</sub>  | LysRS K <sub>249</sub>    | -                                              | 1                                               |
| AIMP2 K <sub>64</sub>  | LysRS K <sub>249</sub>    | -                                              | 1                                               |
|                        |                           |                                                |                                                 |
| AIMP3 K <sub>138</sub> | AspRS K <sub>374</sub>    | 1                                              | 3                                               |
|                        |                           |                                                |                                                 |
| ArgRS K <sub>20</sub>  | GlnRS K <sub>759</sub>    | -                                              | 1                                               |
| ArgRS K <sub>557</sub> | GlnRS K <sub>25</sub>     | -                                              | 1                                               |
|                        |                           |                                                |                                                 |
| ArgRS K <sub>60</sub>  | IleRS K <sub>382</sub>    | -                                              | 1                                               |
| ArgRS K <sub>522</sub> | IleRS K <sub>885</sub>    | 1                                              | -                                               |
|                        |                           |                                                |                                                 |
| ArgRS K <sub>471</sub> | LeuRS K <sub>1102</sub>   | 1                                              | 1                                               |
|                        |                           |                                                |                                                 |
| AspRS K <sub>13</sub>  | GlnRS K <sub>309</sub>    | -                                              | 1                                               |
|                        |                           |                                                |                                                 |
| AspRS K <sub>451</sub> | MetRS K <sub>729</sub>    | -                                              | 2                                               |
|                        |                           |                                                |                                                 |
| GlnRS K <sub>405</sub> | GluProRS K <sub>243</sub> | 1                                              | -                                               |
| GlnRS K <sub>405</sub> | GluProRS K <sub>300</sub> | 1                                              | 2                                               |
| GlnRS K <sub>405</sub> | GluProRS K <sub>435</sub> | 1                                              | -                                               |
|                        |                           |                                                |                                                 |
| IleRS K <sub>382</sub> | LeuRS K <sub>1133</sub>   | -                                              | 1                                               |
| IleRS K <sub>450</sub> | LeuRS K <sub>1133</sub>   | 1                                              | 1                                               |
|                        |                           |                                                |                                                 |
| IleRS K <sub>996</sub> | MetRS K <sub>729</sub>    | -                                              | 1                                               |



**Supplementary Table S2.** Intra-protein cross-links identified by XL-MS.

| Peptide A        | Peptide B        | Occurrences, in-cell experiment (n=1) | Occurrences, on-bead experiments (n=3) |
|------------------|------------------|---------------------------------------|----------------------------------------|
| <b>AIMP1</b>     |                  |                                       |                                        |
| K <sub>54</sub>  | K <sub>46</sub>  | -                                     | 1                                      |
| <b>AIMP3</b>     |                  |                                       |                                        |
| K <sub>88</sub>  | K <sub>136</sub> | -                                     | 1                                      |
| K <sub>88</sub>  | K <sub>138</sub> | 1                                     | 2                                      |
| K <sub>96</sub>  | K <sub>136</sub> | -                                     | 1                                      |
| K <sub>96</sub>  | K <sub>138</sub> | -                                     | 1                                      |
| K <sub>105</sub> | K <sub>136</sub> | -                                     | 1                                      |
| <b>ArgRS</b>     |                  |                                       |                                        |
| K <sub>60</sub>  | K <sub>68</sub>  | 1                                     | 1                                      |
| K <sub>60</sub>  | K <sub>557</sub> | 1                                     | 2                                      |
| K <sub>131</sub> | K <sub>143</sub> | -                                     | 1                                      |
| K <sub>205</sub> | K <sub>321</sub> | -                                     | 1                                      |
| K <sub>321</sub> | K <sub>471</sub> | 1                                     | 3                                      |
| K <sub>347</sub> | K <sub>362</sub> | -                                     | 1                                      |
| K <sub>347</sub> | K <sub>393</sub> | 1                                     | 2                                      |
| K <sub>449</sub> | K <sub>522</sub> | -                                     | 1                                      |
| K <sub>471</sub> | K <sub>476</sub> | 1                                     | 1                                      |
| K <sub>471</sub> | K <sub>478</sub> | 1                                     | 3                                      |
| <b>AspRS</b>     |                  |                                       |                                        |
| K <sub>26</sub>  | K <sub>40</sub>  | 1                                     | 3                                      |
| K <sub>40</sub>  | K <sub>55</sub>  | 1                                     | -                                      |
| K <sub>55</sub>  | K <sub>122</sub> | 1                                     | 1                                      |
| K <sub>241</sub> | K <sub>451</sub> | -                                     | 1                                      |
| <b>GlnRS</b>     |                  |                                       |                                        |
| K <sub>19</sub>  | K <sub>50</sub>  | -                                     | 1                                      |
| K <sub>25</sub>  | K <sub>205</sub> | 1                                     | 2                                      |
| K <sub>25</sub>  | K <sub>498</sub> | 1                                     | 2                                      |
| K <sub>25</sub>  | K <sub>586</sub> | 1                                     | 3                                      |
| K <sub>25</sub>  | K <sub>759</sub> | -                                     | 2                                      |
| K <sub>50</sub>  | K <sub>163</sub> | -                                     | 1                                      |
| K <sub>233</sub> | K <sub>254</sub> | -                                     | 1                                      |
| K <sub>309</sub> | K <sub>421</sub> | -                                     | 1                                      |
| K <sub>309</sub> | K <sub>496</sub> | -                                     | 1                                      |
| K <sub>366</sub> | K <sub>412</sub> | 1                                     | 3                                      |
| K <sub>366</sub> | K <sub>421</sub> | -                                     | 3                                      |
| K <sub>366</sub> | K <sub>498</sub> | 1                                     | 3                                      |
| K <sub>628</sub> | K <sub>673</sub> | 1                                     | 3                                      |
| K <sub>628</sub> | K <sub>769</sub> | 1                                     | 1                                      |
| K <sub>628</sub> | K <sub>774</sub> | -                                     | 2                                      |
| <b>GluProRS</b>  |                  |                                       |                                        |
| K <sub>148</sub> | K <sub>173</sub> | -                                     | 1                                      |
| K <sub>173</sub> | K <sub>417</sub> | -                                     | 2                                      |
| K <sub>197</sub> | K <sub>231</sub> | -                                     | 1                                      |
| K <sub>243</sub> | K <sub>300</sub> | -                                     | 1                                      |
| K <sub>245</sub> | K <sub>435</sub> | 1                                     | 3                                      |
| K <sub>278</sub> | K <sub>282</sub> | -                                     | 1                                      |
| K <sub>282</sub> | K <sub>288</sub> | -                                     | 1                                      |
| K <sub>282</sub> | K <sub>417</sub> | -                                     | 1                                      |
| K <sub>300</sub> | K <sub>435</sub> | 1                                     | 2                                      |

|       |       |   |   |
|-------|-------|---|---|
| K300  | K437  | - | 1 |
| K417  | K472  | 1 | 3 |
| K435  | K437  | - | 2 |
| K435  | K472  | 1 | 3 |
| K491  | K498  | 1 | 3 |
| K578  | K593  | - | 1 |
| K917  | K922  | - | 1 |
| K1010 | K1034 | - | 1 |
| K1089 | K1109 | - | 1 |
| K1091 | K1109 | 1 | 3 |
| K1109 | K1156 | 1 | 3 |
| K1143 | K1156 | - | 1 |
| K1156 | K1213 | - | 2 |
|       |       |   |   |
| IleRS |       |   |   |
| K65   | K132  | - | 2 |
| K132  | K149  | - | 1 |
| K132  | K169  | - | 2 |
| K132  | K382  | 1 | 2 |
| K132  | K410  | - | 2 |
| K132  | K450  | 1 | 3 |
| K132  | K641  | 1 | - |
| K132  | K672  | - | 1 |
| K132  | K996  | - | 2 |
| K169  | K450  | - | 1 |
| K169  | K672  | - | 1 |
| K177  | K450  | - | 1 |
| K268  | K382  | 1 | 3 |
| K268  | K410  | - | 2 |
| K268  | K450  | 1 | 1 |
| K268  | K996  | - | 1 |
| K285  | K288  | 1 | 3 |
| K285  | K450  | 1 | 3 |
| K314  | K450  | - | 1 |
| K375  | K382  | - | 3 |
| K375  | K450  | - | 1 |
| K382  | K410  | 1 | 3 |
| K382  | K450  | 1 | 2 |
| K382  | K996  | - | 1 |
| K410  | K450  | - | 1 |
| K443  | K450  | - | 1 |
| K450  | K641  | - | 3 |
| K450  | K996  | - | 1 |
| K641  | K672  | 1 | 2 |
| K641  | K903  | 1 | 2 |
| K672  | K725  | - | 1 |
| K725  | K816  | 1 | 3 |
| K817  | K861  | - | 1 |
| K839  | K1061 | 1 | - |
| K861  | K868  | - | 1 |
| K868  | K996  | 1 | 1 |
| K878  | K885  | - | 1 |
| K878  | K887  | 1 | 2 |
| K885  | K929  | - | 1 |
| K887  | K996  | - | 1 |
| K903  | K906  | 1 | 3 |
| K996  | K1061 | 1 | 3 |
| K1014 | K1057 | - | 1 |
| K1016 | K1057 | - | 1 |
| K1051 | K1104 | - | 1 |
|       |       |   |   |
| LeuRS |       |   |   |

|                   |                   |   |   |
|-------------------|-------------------|---|---|
| K <sub>270</sub>  | K <sub>283</sub>  | - | 2 |
| K <sub>278</sub>  | K <sub>312</sub>  | - | 1 |
| K <sub>807</sub>  | K <sub>1002</sub> | 1 | 3 |
| K <sub>822</sub>  | K <sub>1002</sub> | 1 | 3 |
| K <sub>1114</sub> | K <sub>1138</sub> | - | 1 |
|                   |                   |   |   |
| <b>LysRS</b>      |                   |   |   |
| K <sub>135</sub>  | K <sub>141</sub>  | 1 | 1 |
| K <sub>223</sub>  | K <sub>243</sub>  | - | 2 |
| K <sub>305</sub>  | K <sub>479</sub>  | 1 | 1 |
| K <sub>363</sub>  | K <sub>370</sub>  | - | 1 |
| K <sub>402</sub>  | K <sub>479</sub>  | 1 | 2 |
| K <sub>407</sub>  | K <sub>479</sub>  | 1 | 3 |
|                   |                   |   |   |
| <b>MetRS</b>      |                   |   |   |
| K <sub>108</sub>  | K <sub>204</sub>  | - | 1 |
| K <sub>375</sub>  | K <sub>491</sub>  | 1 | 3 |
| K <sub>491</sub>  | K <sub>500</sub>  | - | 1 |
| K <sub>663</sub>  | K <sub>729</sub>  | 1 | 3 |
| K <sub>726</sub>  | K <sub>729</sub>  | 1 | 3 |



## **Supplemental Data**

### **3-Dimensional architecture of the human multi-tRNA synthetase Complex**

## Modeling of individual MSC constituents

*ArgRS*. A model of near full-length human ArgRS (Asp<sub>2</sub>-Met<sub>660</sub>) was built from the crystal structure of human ArgRS (chain B, PDB ID: 4R3Z (1)). The N-terminus domain (Asp<sub>2</sub>-Pro<sub>69</sub>) of ArgRS was relocated to satisfy Lys-Lys intra-molecular cross-links.

*AspRS*. A model of near full-length human AspRS monomer (Ala<sub>4</sub>-Asp<sub>495</sub>) was built from the crystal structure of human AspRS (Ala<sub>21</sub>-Asp<sub>495</sub>, PDB ID: 4J15 (2)) and a peptide (Ala<sub>4</sub>-Ala<sub>20</sub>) for the N-terminus modeled using SWISS-MODEL. Domains missing from this crystal structure, i.e., Met<sub>1</sub>-Ala<sub>20</sub>, Glu<sub>163</sub>-Ala<sub>172</sub>, Ile<sub>224</sub>-Ala<sub>247</sub>, Arg<sub>273</sub>-His<sub>282</sub>, and Pro<sub>496</sub>-Pro<sub>501</sub> were constructed in the model except for Pro<sub>496</sub>-Pro<sub>501</sub>. To generate the cross-link between the N-terminus of AspRS (Lys<sub>13</sub>) and GlnRS (Lys<sub>309</sub>) a *de novo*-built  $\alpha$ -helical peptide (Ala<sub>4</sub>-Ala<sub>20</sub>) was appended and the conformation of Ala<sub>21</sub>-Asp<sub>50</sub> domain adjusted to satisfy the AspRS-GlnRS intermolecular crosslink. For construction of the MSC model with the AspRS dimer, the second chain was added by aligning chain A from the crystal structure of AspRS (PDB ID: 4J15 (2)) with the monomer in the MSC model. Maintaining the observed crosslinks between ArgRS and GlnRS induced some overlap of AspRS chain B with ArgRS.

*GlnRS*. A model of full-length human GlnRS (Met<sub>1</sub>-Val<sub>775</sub>) was built starting from the crystal structure of human GlnRS (Met<sub>1</sub>-Asp<sub>771</sub>) (PDB ID: 4YE6 (3)). Domains missing from this crystal structure, i.e., Ala<sub>183</sub>-Gln<sub>216</sub>, Glu<sub>363</sub>-Asn<sub>369</sub>, Glu<sub>459</sub>-Gln<sub>461</sub>, Ala<sub>585</sub>-Leu<sub>588</sub>, Leu<sub>630</sub>-Leu<sub>638</sub>, Ala<sub>668</sub>-Lys<sub>673</sub>, and Pro<sub>772</sub>-Val<sub>775</sub>, were constructed with SWISS-MODEL. The N-terminus domain (Met<sub>1</sub>-Glu<sub>182</sub>) was relocated with respect to the catalytic domain to satisfy XL-MS-derived intra-molecular crosslinks.

*GluRS*. A model of near full-length (Ala<sub>2</sub>-Gln<sub>682</sub>) human GluRS was assembled from the crystal structures of the GST-like domain (Ala<sub>2</sub>-Thr<sub>171</sub>) of human GluRS (chain C, PDB ID: 5Y6L (4)) and the catalytic domain (Leu<sub>87</sub>-Lys<sub>533</sub>) of GluRS from archaeal

*Methanothermobacter thermautotrophicus* (PDB ID: 3All (5)) corresponding to Phe<sub>187</sub>-Gln<sub>682</sub> in human GluRS, plus a *de novo*-built spacer (Thr<sub>172</sub>-Lys<sub>186</sub>) joining the GluRS GST-like and CD domains to satisfy intra-molecular cross-links.

*GluProRS*. A three-dimensional model of A and B chains of full-length human GluProRS (Ala<sub>2</sub>-Tyr<sub>1512</sub>) was assembled from human GluRS monomer, a model of the WHEP domain-containing linker (Pro<sub>683</sub>-Gly<sub>1015</sub>), and the crystal structure of ProRS dimer (PDB ID: 4HVC, (6)). The crystal structure of the multifunctional peptide motif-1 (helix-turn-helix, WHEP domain 1) from human GluProRS (PDB ID: 1FYJ (7)) was used to model the three helix-turn-helix WHEP domains Asp<sub>749</sub>-Pro<sub>805</sub>, Leu<sub>826</sub>-Pro<sub>878</sub>, and Val<sub>903</sub>-Ala<sub>955</sub>. Peptide regions (Pro<sub>683</sub>-Glu<sub>748</sub>, Ala<sub>806</sub>-Ser<sub>825</sub>, Leu<sub>879</sub>-Lys<sub>902</sub>, Thr<sub>956</sub>-Gly<sub>1015</sub>) joining the WHEP domains were modeled as unstructured loops.

*IleRS*. A model of full-length human IleRS (Met<sub>1</sub>-Phe<sub>1262</sub>) was built by homology modeling using multiple crystal structures. The domain Met<sub>1</sub>-Ile<sub>841</sub> was modeled based on the crystal structure of IleRS from *Thermus thermophilus* (chain A, PDB ID: 1JZQ (8)), Ile<sub>843</sub>-Ser<sub>915</sub> was based on LeuRS from *Pyrococcus horikoshii* (chain B, PDB ID: 1WZ2 (9)), Ile<sub>918</sub>-Ser<sub>945</sub> was based on human pre-mRNA branch site protein p14 (chain B, PDB ID: 2F9D (10)), Ala<sub>967</sub>-Thr<sub>1035</sub> was based on heterodisulfide reductase from *Methanothermococcus thermolithotrophicus DSM* (chain D, PDB ID: 5ODC (11)), Ser<sub>1063</sub>-Pro<sub>1160</sub> was based on RANBP/C3HC4-type zinc finger containing protein 1 from *Mus musculus* (chain A, PDB ID: 5Y3T (12)), and Ser<sub>1161</sub>-Leu<sub>1256</sub> was based on human diubiquitin (chain B, PDB ID: 2Y5B (13)). Homologous crystal structures were not found for Arg<sub>946</sub>-Asp<sub>966</sub> and Thr<sub>1036</sub>-Gly<sub>1062</sub>, and these regions were modeled *de novo*.

*LeuRS*. A model of near full-length human LeuRS (Phe<sub>12</sub>-Leu<sub>1151</sub>) was built by homology modeling. Phe<sub>12</sub>-Phe<sub>1061</sub> was modeled based on the crystal structure of LeuRS from *Pyrococcus horikoshii* (chain B, PDB ID: 1WZ2(9)), Val<sub>1067</sub>-Met<sub>1116</sub> was from ubiquitin-



like protein MDY2 from *Saccharomyces cerevisiae* (chain C, PDB ID: 3ZDM (14)), and Leu<sub>1123</sub>-Leu<sub>1151</sub> was based on human VPX protein (chain B, PDB ID: 4Z8L). Short missing regions were de novo built with SWISS-MODEL.

*LysRS*. The crystal structure of human LysRS (Asp<sub>72</sub>-Glu<sub>576</sub>) (chain A PDB ID: 6ILD (15)) was used without modification.

*MetRS*. A model of full-length (Met<sub>1</sub>-Lys<sub>900</sub>) human MetRS was assembled from the crystal structures of the GST-like domain (Met<sub>1</sub>-Ala<sub>211</sub>) of human MetRS (chain A, PDB ID: 5Y6L (4)), the catalytic domain (Ala<sub>226</sub>-Ala<sub>822</sub>) of human MetRS (PDB ID: 5GL7), and the human MetRS WHEP-TRS domain (Thr<sub>835</sub>-Lys<sub>900</sub>) (PDB ID: 2DJV), plus two *de novo* spacers (Glu<sub>212</sub>-Leu<sub>225</sub> and Lys<sub>823</sub>-Val<sub>834</sub>). The 14-aa spacer Glu<sub>212</sub>-Leu<sub>225</sub> that connects the GST-like and catalytic (CD) domains, was modeled as an  $\alpha$ -helical peptide (Lys<sub>729</sub>-Lys<sub>451</sub>) to position the CD and GST-like domains thus satisfying the constraint of a MetRS-AspRS cross-link. A second 12-aa spacer (Lys<sub>823</sub>-Val<sub>834</sub>) attached the WHEP domain of human MetRS to the CD domain.

*AIMP1*. A model of the human AIMP1 (Asp<sub>5</sub>-Lys<sub>312</sub>) was assembled from the crystal structure of the N-terminus domain of human AIMP1 (Asp<sub>5</sub>-Phe<sub>80</sub>) (chain A, PDB ID: 4R3Z(1)), a *de novo*-built  $\alpha$ -helical structure for Pro<sub>81</sub>-Lys<sub>148</sub>, and a homology model for Pro<sub>149</sub>-Lys<sub>312</sub> based on the crystal structure of human endothelium monocyte activating polypeptide 2 (EMAPII) (chain A, PDB ID: 1EUJ (16)). AIMP1 conformation was dictated by inter-molecular cross-links with AARSs in the MSC.

*AIMP2*. A model of AIMP2 (Pro<sub>2</sub>-Lys<sub>320</sub>) was assembled from the crystal structure of N-terminus domain (Pro<sub>2</sub>-His<sub>31</sub>) of human AIMP2 (chain C, PDB ID: 6ILD(15)), a model of Glu<sub>46</sub>-Gln<sub>81</sub> based on bifunctional tail protein PIIGCN4 from *Saccharomyces cerevisiae* (PDB ID: 2VNL (17)), and the GST-like domain of human AIMP2 (Leu<sub>106</sub>-Lys<sub>320</sub>) (chain D, PDB ID: 5Y6L (4)). Gly<sub>32</sub>-Gln<sub>45</sub> and Thr<sub>82</sub>-Ala<sub>105</sub> domains were *de novo*-built with

SWISS-MODEL. AIMP2 conformation was dictated by cross-links with AARSs in the MSC.

*AIMP3*. The crystal structure of human aminoacyl tRNA synthetase complex-interacting multifunctional protein 3 (AIMP3, Met<sub>1</sub>-Asn<sub>172</sub>) (chain B, PDB ID: 5Y6L(4)) was used without modification.

### **Stepwise assembly of the MSC structural model**

*1. Construction of the pentameric MSC core.* To construct the protein core consisting of monomers of AspRS, MetRS, GluRS, AIMP3, and the GST-like domain of AIMP2, AspRS (Ala<sub>21</sub>-Asp<sub>495</sub>) was first aligned with the AspRS fragment Pro<sub>336</sub>-Lys<sub>393</sub> from the pentameric crystal structure 5Y6L (chain E) (4). Next, the catalytic domains of MetRS and GluRS were anchored to their corresponding GST-like domains from the crystal structure (chain A and C, PDB ID: 5Y6L (4)) by *de novo*-built spacers (*vide supra*) to satisfy XL-MS-derived intra- and inter-molecular cross-links.

*2. Docking GlnRS.* Before docking GlnRS to the AARS core, the Arg<sub>58</sub>-Ala<sub>105</sub> domain of AIMP2 was joined to its GST-like domain (Leu<sub>106</sub>-Lys<sub>320</sub>) (chain D, PDB ID: 5Y6L (4)). The human GlnRS model was docked to the AARS core using distance constraints corresponding to GlnRS-GluRS and GlnRS-AIMP2 intermolecular cross-links.

*3. Appending the N-terminus of AspRS.* A *de novo*-built model of the N-terminus domain (Ala<sub>4</sub>-Ala<sub>20</sub>) of AspRS (*vide supra*) was joined to AspRS and docked to GlnRS using distance constraints corresponding to the peptide bond length between residues Ala<sub>20</sub> and Ala<sub>21</sub> of AspRS, and an intermolecular AspRS-GlnRS cross-link.

*4. Docking ArgRS.* ArgRS was docked to the partially assembled MSC using distance constraints corresponding to the intermolecular ArgRS-GlnRS cross-links.

5. *Appending the N-terminus of AIMP1.* We modeled the interaction between the tetramer of GST-like containing proteins and the N-terminus of AIMP1 as reported (18,19). The N-terminus of AIMP1 (Asp<sub>5</sub>-Phe<sub>80</sub>) (chain A, PDB ID:4R3Z(1)) was docked to the partially assembled MSC so that the N-terminus of the fragment interacts with the GST-like domain of AIMP2, while the C-terminus interacts with AIMP3.

6. *Docking IleRS.* IleRS was docked to the partially assembled MSC in two steps. First, the IleRS model was split into an N-terminus domain (Met<sub>1</sub>-Pro<sub>842</sub>) and a C-terminus domain (Ile<sub>843</sub>-Phe<sub>1262</sub>), and docked separately to permit conformational flexibility. Initially, the N- and C-terminus domains were positioned such that the peptide bond Pro<sub>842</sub>-Ile<sub>843</sub> and the intermolecular cross-links of IleRS with MetRS and ArgRS were satisfied. Next, the C-terminus domain (Ile<sub>843</sub>-Phe<sub>1262</sub>) was docked using distance constraints corresponding to the peptide bond length between Pro<sub>842</sub> and Ile<sub>843</sub>, and the IleRS-ArgRS cross-link. Finally, with the C-terminus domain in place, the N-terminus domain (Met<sub>1</sub>-Pro<sub>842</sub>) was docked using distance constraints corresponding to the peptide bond between residues Pro<sub>842</sub> and Ile<sub>843</sub>, and the IleRS-MetRS cross-link.

7. *Appending the C-terminus of LeuRS.* LeuRS was split into N-terminus (Phe<sub>12</sub>-Phe<sub>1061</sub>) and C-terminus (Arg<sub>1062</sub>-Leu<sub>1151</sub>) domains and docked separately. The C-terminus domain was docked first to the partially assembled MSC using distance constraints corresponding to LeuRS-ArgRS and LeuRS-IleRS cross-links.

8. *Docking LysRS.* Monomeric LysRS (Asp<sub>72</sub>-Glu<sub>576</sub>) (chain A, PDB ID: 6ILD (15)) with bound AIMP2 (Pro<sub>2</sub>-Glu<sub>19</sub>) (chain C, PDB ID: 6ILD (15)) was manually docked to the partially assembled MSC using distance constraints corresponding to the LysRS (chain A)-AIMP2 cross-link. Next, the Leu<sub>20</sub>-Ser<sub>57</sub> domain of AIMP2 was de novo built and joined to AIMP2. For assembly of the LysRS dimer, chain B was included with chain A as indicated in crystal structure (PDB ID: 6ILD (15)).



*9. Appending the C-terminus of AIMP1.* The C-terminus domain of AIMP1 (Pro<sub>81</sub>-Lys<sub>312</sub>) was threaded through the partially assembled MSC and docked using distance constraints corresponding to the peptide bond between Phe<sub>80</sub> and Pro<sub>81</sub> and the AIMP1-ArgRS cross-link. To complete the model of AIMP1, the crystal structure of human EMAPII (chain A, PDB ID: 1EUJ(16)) (Pro<sub>149</sub>-Lys<sub>312</sub>) was joined to AIMP1 and docked using a constraint corresponding to the peptide bond between Lys<sub>148</sub> and Pro<sub>149</sub>.

*10. Appending the N-terminus of LeuRS.* The N-terminus of LeuRS (Phe<sub>12</sub>-Phe<sub>1061</sub>) was docked satisfying the peptide bond constraint between Phe<sub>1061</sub> and Arg<sub>1062</sub>.

*11. Appending GluProRS dimer.* The GluProRS dimer was added to the MSC by replacing the GluRS monomer in the assembled MSC with GluRS chain A of the GluProRS dimer.

## REFERENCES – SUPPLEMENTAL DATA

1. Fu, Y., Kim, Y., Jin, K.S., Kim, H.S., Kim, J.H., Wang, D., Park, M., Jo, C.H., Kwon, N.H., Kim, D. *et al.* (2014) Structure of the ArgRS-GlnRS-AIMP1 complex and its implications for mammalian translation. *Proc. Natl. Acad. Sci. U. S. A.*, **111**, 15084-15089.
2. Kim, K.R., Park, S.H., Kim, H.S., Rhee, K.H., Kim, B.G., Kim, D.G., Park, M.S., Kim, H.J., Kim, S. and Han, B.W. (2013) Crystal structure of human cytosolic aspartyl-tRNA synthetase, a component of multi-tRNA synthetase complex. *Proteins*, **81**, 1840-1846.
3. Ognjenovic, J., Wu, J., Matthies, D., Baxa, U., Subramaniam, S., Ling, J. and Simonovic, M. (2016) The crystal structure of human GlnRS provides basis for the development of neurological disorders. *Nucleic Acids Res.*, **44**, 3420-3431.
4. Cho, H.Y., Lee, H.J., Choi, Y.S., Kim, D.K., Jin, K.S., Kim, S. and Kang, B.S. (2019) Symmetric assembly of a decameric subcomplex in human multi-tRNA synthetase complex via interactions between glutathione transferase-homology domains and aspartyl-tRNA synthetase. *J. Mol. Biol.*, **431**, 4475-4496.
5. Nureki, O., O'Donoghue, P., Watanabe, N., Ohmori, A., Oshikane, H., Araiso, Y., Sheppard, K., Soll, D. and Ishitani, R. (2010) Structure of an archaeal non-discriminating glutamyl-tRNA synthetase: a missing link in the evolution of Gln-tRNA<sup>Gln</sup> formation. *Nucleic Acids Res.*, **38**, 7286-7297.
6. Zhou, H., Sun, L., Yang, X.L. and Schimmel, P. (2013) ATP-directed capture of bioactive herbal-based medicine on human tRNA synthetase. *Nature*, **494**, 121-124.
7. Jeong, E.J., Hwang, G.S., Kim, K.H., Kim, M.J., Kim, S. and Kim, K.S. (2000) Structural analysis of multifunctional peptide motifs in human bifunctional tRNA synthetase: Identification of RNA-binding residues and functional implications for tandem repeats. *Biochemistry*, **39**, 15775-15782.

8. Nakama, T., Nureki, O. and Yokoyama, S. (2001) Structural basis for the recognition of isoleucyl-adenylate and an antibiotic, mupirocin, by isoleucyl-tRNA synthetase. *J. Biol. Chem.*, **276**, 47387-47393.
9. Fukunaga, R., Ishitani, R., Nureki, O. and Yokoyama, S. (2005) Crystallization of leucyl-tRNA synthetase complexed with tRNA<sup>Leu</sup> from the archaeon *Pyrococcus horikoshii*. *Acta Crystallogr. Sect. F Struct. Biol. Cryst. Commun.*, **61**, 30-32.
10. Schellenberg, M.J., Edwards, R.A., Ritchie, D.B., Kent, O.A., Golas, M.M., Stark, H., Luhrmann, R., Glover, J.N. and MacMillan, A.M. (2006) Crystal structure of a core spliceosomal protein interface. *Proc. Natl. Acad. Sci. U. S. A.*, **103**, 1266-1271.
11. Wagner, T., Koch, J., Ermler, U. and Shima, S. (2017) Methanogenic heterodisulfide reductase (HdrABC-MvhAGD) uses two noncubane [4Fe-4S] clusters for reduction. *Science*, **357**, 699-703.
12. Fujita, H., Tokunaga, A., Shimizu, S., Whiting, A.L., Aguilar-Alonso, F., Takagi, K., Walinda, E., Sasaki, Y., Shimokawa, T., Mizushima, T. *et al.* (2018) Cooperative domain formation by Hhomologous motifs in HOIL-1L and SHARPIN plays a crucial role in LUBAC stabilization. *Cell Rep.*, **23**, 1192-1204.
13. Ye, Y., Akutsu, M., Reyes-Turcu, F., Enchev, R.I., Wilkinson, K.D. and Komander, D. (2011) Polyubiquitin binding and cross-reactivity in the USP domain deubiquitinase USP21. *EMBO Rep.*, **12**, 350-357.
14. Tung, J.Y., Li, Y.C., Lin, T.W. and Hsiao, C.D. (2013) Structure of the Sgt2 dimerization domain complexed with the Get5 UBL domain involved in the targeting of tail-anchored membrane proteins to the endoplasmic reticulum. *Acta Crystallogr. D. Biol. Crystallogr.*, **69**, 2081-2090.
15. Hei, Z., Wu, S., Liu, Z., Wang, J. and Fang, P. (2019) Retractable lysyl-tRNA synthetase-AIMP2 assembly in the human multi-aminoacyl-tRNA synthetase complex. *J. Biol. Chem.*, **294**, 4775-4783.



16. Kim, Y., Shin, J., Li, R., Cheong, C., Kim, K. and Kim, S. (2000) A novel anti-tumor cytokine contains an RNA binding motif present in aminoacyl-tRNA synthetases. *J. Biol. Chem.*, **275**, 27062-27068.
17. Seul, A., Muller, J.J., Andres, D., Stettner, E., Heinemann, U. and Seckler, R. (2014) Bacteriophage P22 tailspike: structure of the complete protein and function of the interdomain linker. *Acta Crystallogr. D. Biol. Crystallogr.*, **70**, 1336-1345.
18. Schwarz, M.A., Lee, D.D. and Bartlett, S. (2018) Aminoacyl tRNA synthetase complex interacting multifunctional protein 1 simultaneously binds Glutamyl-Prolyl-tRNA synthetase and scaffold protein aminoacyl tRNA synthetase complex interacting multifunctional protein 3 of the multi-tRNA synthetase complex. *Int. J. Biochem. Cell Biol.*, **99**, 197-202.
19. Norcum, M.T. and Warrington, J.A. (2000) The cytokine portion of p43 occupies a central position within the eukaryotic multisynthetase complex. *J. Biol. Chem.*, **275**, 17921-17924.
